# Supplementary material for: Improvement of the fluorescent sensing biomarker 3-nitrotyrosine for a new luminescent coordination polymer by size regulation
Source: Royal Society of Chemistry journal article supplement (doi:10.1039/d2ce01397e), 2022-01-01
Supplement: d2ce01397e1.pdf [file d2ce01397e1.pdf]

## **Improvement of the fluorescent sensing biomarker 3-nitrotyrosine for a new luminescent coordination polymer by size regulation**

Jun Geng, Hongyan Lin, Xiaohui Li, Junjun Lu, Qianqian Liu and Xiuli Wang\*

*College of Chemistry and Materials Engineering, Professional Technology Innovation Center of Liaoning Province for Conversion Materials of Solar Cell, Bohai University, Jinzhou 121013, P. R. China*

### ***Section 1 Experimental***

#### **I. Materials and general methods**

The ligand L was prepared according to the synthesis method of the literature.<sup>1</sup> The reagents and solvents used in the experiments were purchased from commercial sources and used without further purification. The single X-ray diffraction (XRD) data for LCP 1 was collected by using a Bruker SMART APEX II CCD diffractometer at 293 K with Mo K $\alpha$  radiation ( $\lambda = 0.71073 \text{ \AA}$ ). The infrared (IR) spectra data were gathered on a Varian640 FTIR spectrometer through KBr pellet from 500 cm<sup>-1</sup> to 4000 cm<sup>-1</sup> region, and the powder X-ray diffraction (PXRD) patterns were collected on a D/teX Ultra diffractometer with Mo K $\alpha$  radiation ( $\lambda = 0.71073 \text{ \AA}$ ). The morphology and structure of the samples were characterized by scanning electron microscopy (SEM, Nova NanoSEM 430). The fluorescent spectra were recorded on a Hitachi F-4500 luminescence/phosphorescence spectrometer. Fluorescence lifetime data was obtained on the FLS1000 transient steady-state fluorescence spectrometer. UV-vis absorption spectra were carried out on SP-1900. The PHS-3C-meter with an E-201-C glass electrode was used to determine the pH of the solution.

#### **II. X-ray crystallography.**

Data collection was performed on a Bruker Smart APEX II diffractometer with K $\alpha$  ( $\lambda = 0.71073 \text{ \AA}$ ) by  $\theta$  and  $\omega$  scan mode at room temperature. The crystal structure was solved by direct method using the SHELXT program of the Olex 2 crystallographic software package and refined on  $F^2$  by full-matrix least-squares methods.<sup>2</sup> Anisotropic thermal parameters were utilized in all non-hydrogen atoms. Crystal data and structural refinements were displayed in Table S1. CCDC No. 2164207. Selected bond lengths

and angles were shown in Table S2 for LCP 1.

### III. Luminescent sensing experiments

During the sensing experiments, LCP 1 (3 mg) was ground in air, dispersed in 4 mL of water or organic solution, and sonicated for 30 min to form a dispersed solution. The Nano-LCP 1 does not need to be ground, other steps are the same as LCP 1. Then, the analyte to be tested is added to the suspension to perform a fluorescence titration experiments, and the fluorescence intensity is detected by a fluorescence spectrometer. In the cycling experiments, the samples were washed with ethanol, and after drying, the above experimental steps were repeated to continue the fluorescence titration experiments.

**Table S1.** Crystallographic data for LCP 1.

| Complex                                    | LCP 1                                                                          |
|--------------------------------------------|--------------------------------------------------------------------------------|
| Empirical formula                          | C <sub>44</sub> H <sub>34</sub> Cd <sub>3</sub> N <sub>4</sub> O <sub>18</sub> |
| Formula weight                             | 1243.95                                                                        |
| Temperature/K                              | 296.15                                                                         |
| Crystal system                             | triclinic                                                                      |
| Space group                                | <i>P</i> -1                                                                    |
| <i>a</i> (Å)                               | 9.7026(12)                                                                     |
| <i>b</i> (Å)                               | 9.9293(13)                                                                     |
| <i>c</i> (Å)                               | 12.8415(16)                                                                    |
| $\alpha$ (°)                               | 100.645(2)                                                                     |
| $\beta$ (°)                                | 99.837(2)                                                                      |
| $\gamma$ (°)                               | 116.544(2)                                                                     |
| <i>V</i> (Å <sup>3</sup> )                 | 1041.5(2)                                                                      |
| <i>Z</i>                                   | 1                                                                              |
| <i>D<sub>c</sub></i> (g cm <sup>-3</sup> ) | 1.983                                                                          |
| $\mu$ (mm <sup>-1</sup> )                  | 1.606                                                                          |
| <i>F</i> (000)                             | 614.0                                                                          |
| Reflections collected                      | 5766                                                                           |

|                                   |                                                   |
|-----------------------------------|---------------------------------------------------|
| Data/restraints/parameters        | 3671/3/313                                        |
| Goodness-of-fit on F <sup>2</sup> | 1.037                                             |
| Final R indexes [I>=2σ (I)]       | R <sub>1</sub> = 0.0501, wR <sub>2</sub> = 0.1202 |
| Final R indexes [all data]        | R <sub>1</sub> = 0.0844, wR <sub>2</sub> = 0.1373 |

$${}^a R_1 = \Sigma ||F_o| - |F_c|| / \Sigma |F_o|, {}^b wR_2 = \Sigma [w(F_o^2 - F_c^2)^2] / \Sigma [w(F_o^2)^2]^{1/2}$$

**Table S2.** Selected bond distances (Å) and angles (°) for LCP 1.

| LCP 1                                                                                                                   |          |                     |            |
|-------------------------------------------------------------------------------------------------------------------------|----------|---------------------|------------|
| Cd(1)-O(5)#1                                                                                                            | 2.280(5) | O(4)#2-Cd(2)-O(4)   | 180.0      |
| Cd(1)-O(2)                                                                                                              | 2.222(6) | O(4)#2-Cd(2)-O(6)#3 | 86.8(2)    |
| Cd(1)-O(3)                                                                                                              | 2.445(6) | O(4)-Cd(2)-O(6)#3   | 93.2(2)    |
| Cd(1)-N(1)                                                                                                              | 2.296(7) | O(4)#2-Cd(2)-O(6)#4 | 93.2(2)    |
| Cd(2)-O(4)                                                                                                              | 2.170(5) | O(4)-Cd(2)-O(6)#4   | 86.8(2)    |
| Cd(2)-O(4)#2                                                                                                            | 2.170(5) | O(4)-Cd(2)-O(3)#5   | 86.7(2)    |
| Cd(2)-O(6)#3                                                                                                            | 2.310(5) | O(4)#2-Cd(2)-O(3)#5 | 93.3(2)    |
| Cd(2)-O(6)#4                                                                                                            | 2.310(5) | O(4)#2-Cd(2)-O(3)#6 | 86.7(2)    |
| Cd(2)-O(3)#5                                                                                                            | 2.519(6) | O(4)-Cd(2)-O(3)#6   | 93.3(2)    |
| Cd(2)-O(3)#6                                                                                                            | 2.519(6) | O(6)#3-Cd(2)-O(6)#4 | 180.0      |
| O(5)#1-Cd(1)-O(3)                                                                                                       | 78.7(2)  | O(6)#3-Cd(2)-O(3)#6 | 104.47(19) |
| O(5)#1-Cd(1)-N(1)                                                                                                       | 83.7(2)  | O(6)#3-Cd(2)-O(3)#5 | 75.53(19)  |
| O(2)-Cd(1)-O(5)#1                                                                                                       | 135.0(2) | O(6)#4-Cd(2)-O(3)#6 | 75.53(19)  |
| O(2)-Cd(1)-O(3)                                                                                                         | 92.3(2)  | O(6)#4-Cd(2)-O(3)#5 | 104.47(19) |
| O(2)-Cd(1)-N(1)                                                                                                         | 103.2(3) | O(3)#5-Cd(2)-O(3)#6 | 180        |
| N(1)-Cd(1)-O(3)                                                                                                         | 161.9(2) |                     |            |
| Symmetry code: #1 -1+X, -1+Y, +Z; #2 3-X, 2-Y, -Z; #3 2-X, 2-Y, 2-Z; #4 1+X, +Y, +Z; #5 2-X, 1-Y, 2-Z; #6 1+X, 1+Y, +Z; |          |                     |            |

## Section 2 Results and Discussion

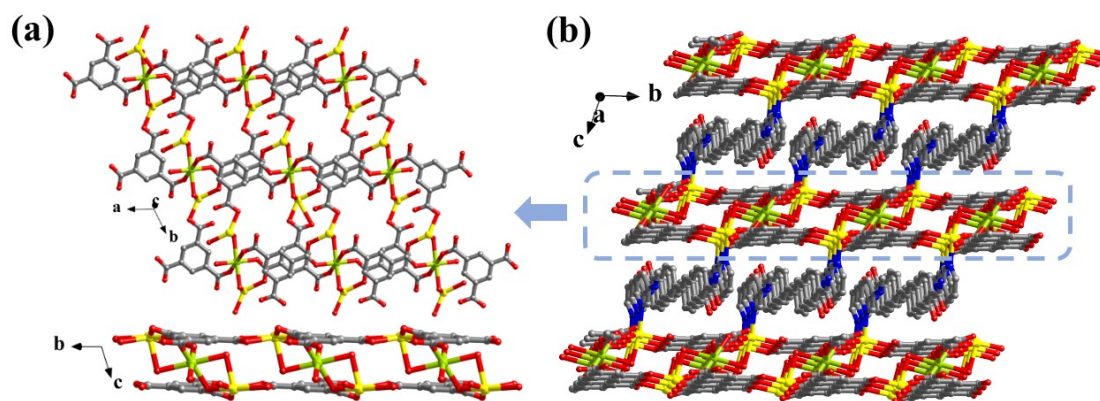

Figure S1. (a) The 2D bilayer structure; (b) View of the 3D framework of LCP 1.

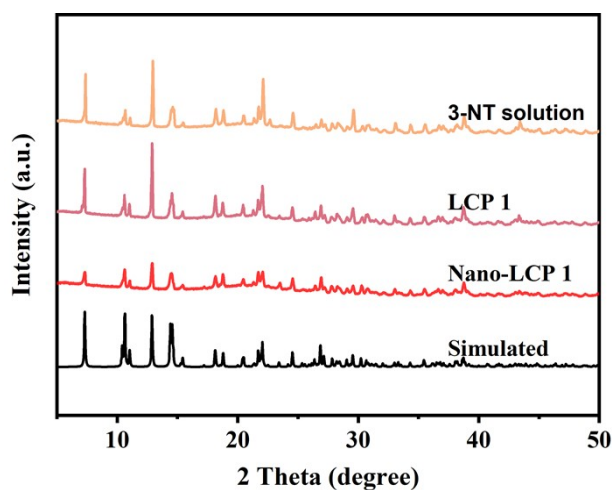

Figure S2. The PXRD of LCP 1 and Nano-LCP 1.

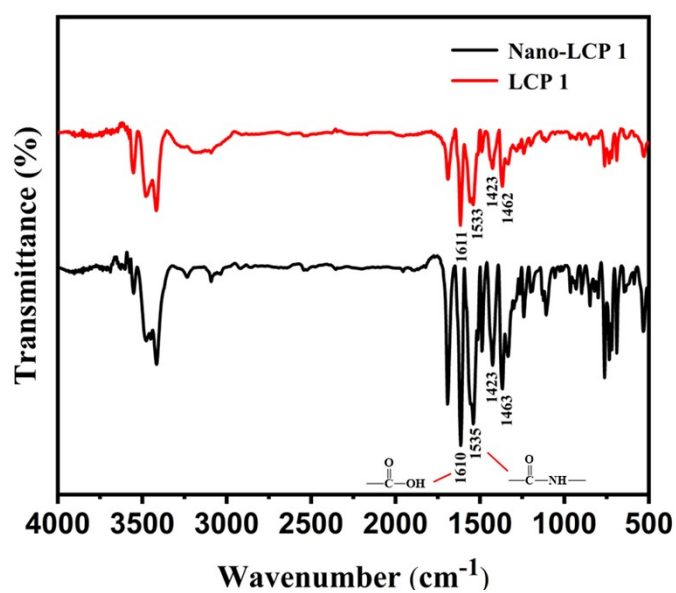

Figure S3. FT-IR spectra of LCP 1 and Nano-LCP 1.

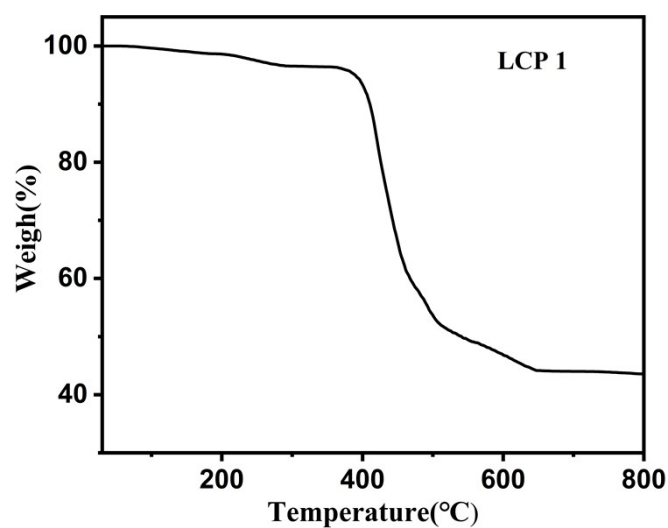

**Figure S4.** The TG curve of LCP 1.

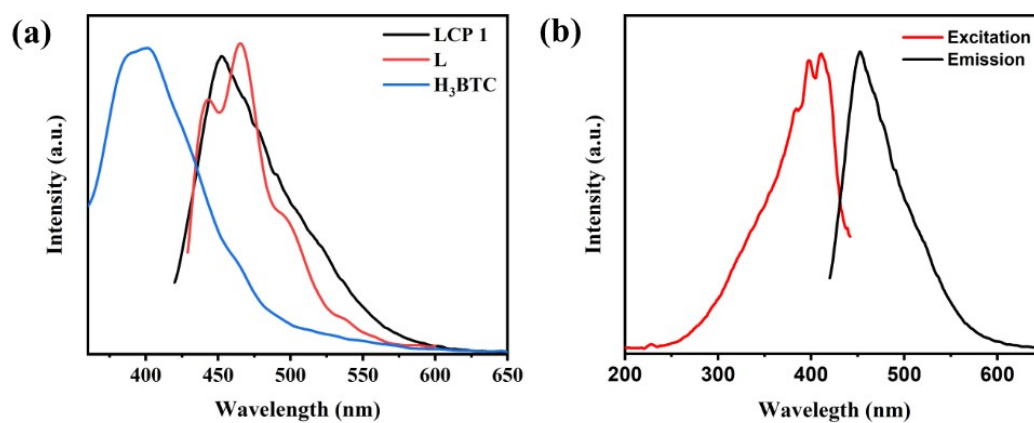

**Figure S5.** (a) The emission spectra of solid-state LCP 1, L and H<sub>3</sub>BTC; (b) The solid excitation and emission spectra of LCP 1.

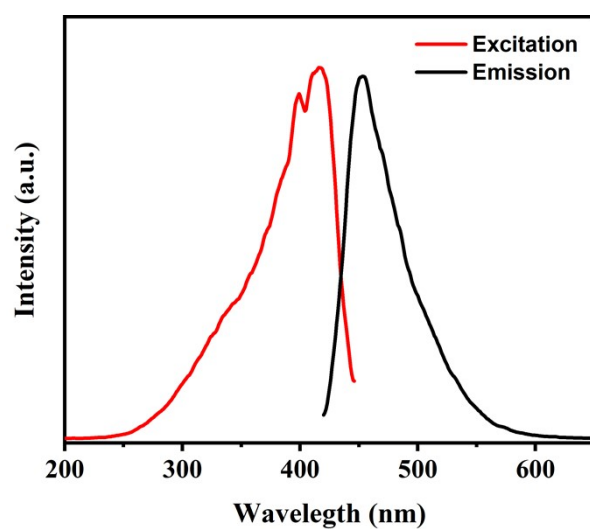

**Figure S6.** The emission and excitation spectra of solid-state Nano-LCP 1.

**Table S3** Comparison of various methods for 3-NT detection.

| Methods                            | LOD (mol/L)            | References                         |
|------------------------------------|------------------------|------------------------------------|
| LC-MS/MS                           | $1.70 \times 10^{-11}$ | Göen et al. (2005) <sup>3</sup>    |
| SPE <sup>a</sup> – HPLC            | $3.10 \times 10^{-6}$  | Mergola et al. (2013) <sup>4</sup> |
| Real time-tandem mass spectrometry | $8.80 \times 10^{-7}$  | Song et al. (2015) <sup>5</sup>    |
| HPLC                               | $2.30 \times 10^{-8}$  | Monica et al. (2017) <sup>6</sup>  |
| Surface plasmon resonance          | $5.30 \times 10^{-10}$ | He et al. (2019) <sup>7</sup>      |
| Molecular Imprinting               | $2.23 \times 10^{-8}$  | Martins et al. (2020) <sup>8</sup> |
| Electrochemiluminescence           | $8.40 \times 10^{-9}$  | Zhu et al. (2021) <sup>9</sup>     |
| Fluorescence                       | $3.10 \times 10^{-7}$  | Wang et al. (2022) <sup>10</sup>   |
| Fluorescence                       | $2.30 \times 10^{-8}$  | Present work                       |

<sup>a</sup> Solid-phase extraction.

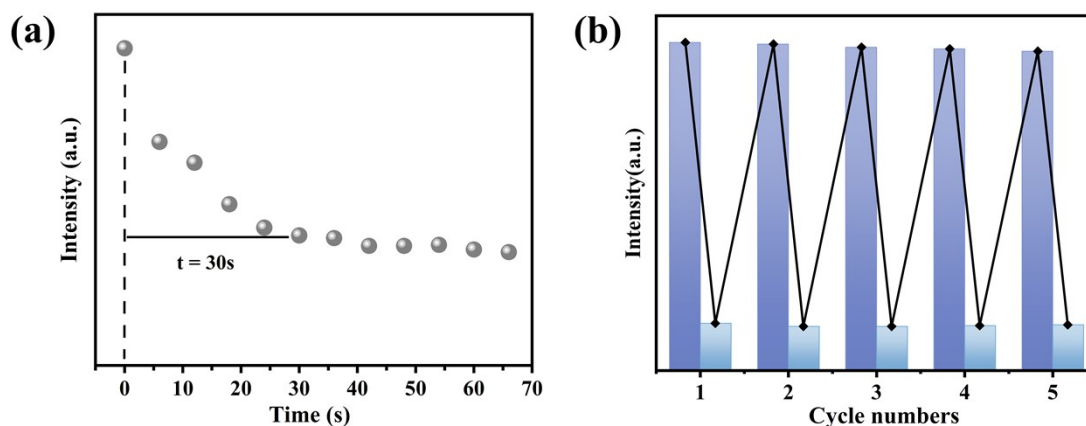

**Figure S7.** (a) Response time of LCP 1 for 3-NT; (b) Reproducibility of the sensing function of LCP 1 with five continuously quenching cycles (the blue-violet bars are for the luminescence intensity of LCP 1 and the dusty blue bars are for the intensity upon the addition of 3-NT aqueous solution).

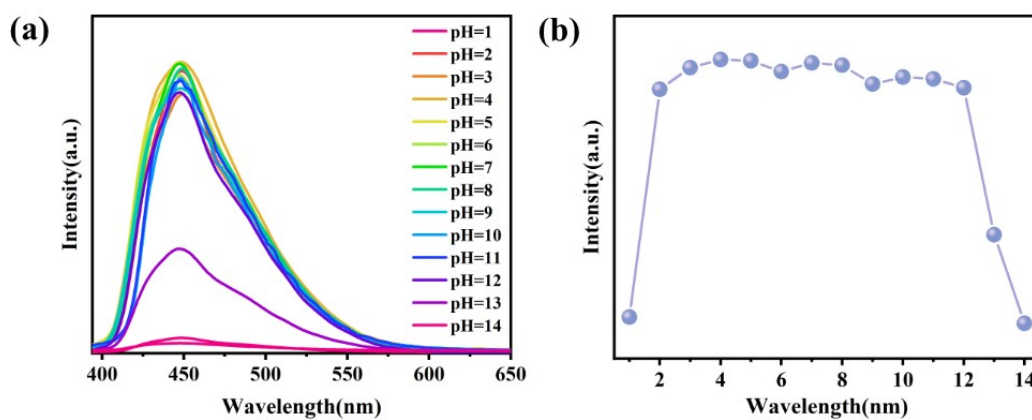

**Figure S8.** (a) Emission spectra and intensities of LCP 1 suspensions in different pH values; (b) Emission intensity line chart of LCP 1 suspensions in different pH values.

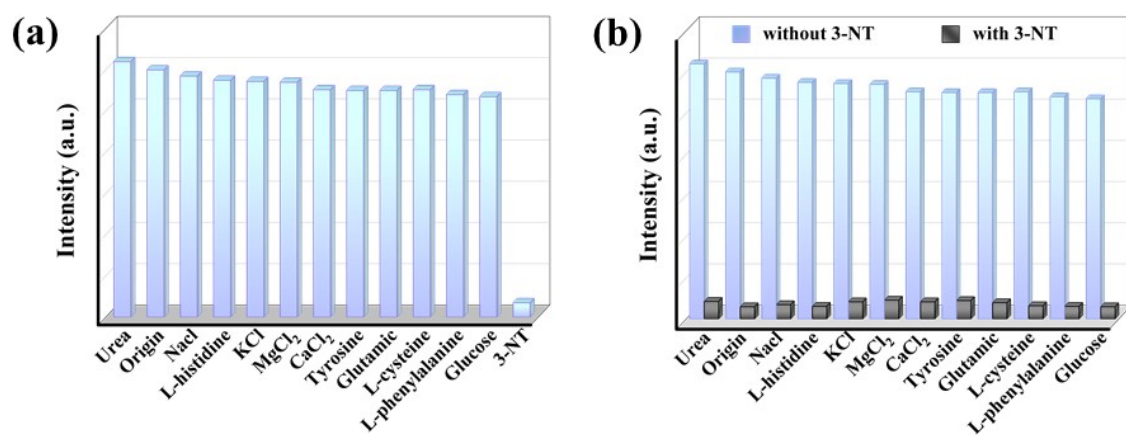

**Figure S9.** (a) Sensing selectivity of 3-NT by LCP 1 toward the main chemical components in human blood; (b) Anti-interference test of LCP 1 after adding 3-NT in different main chemical components.

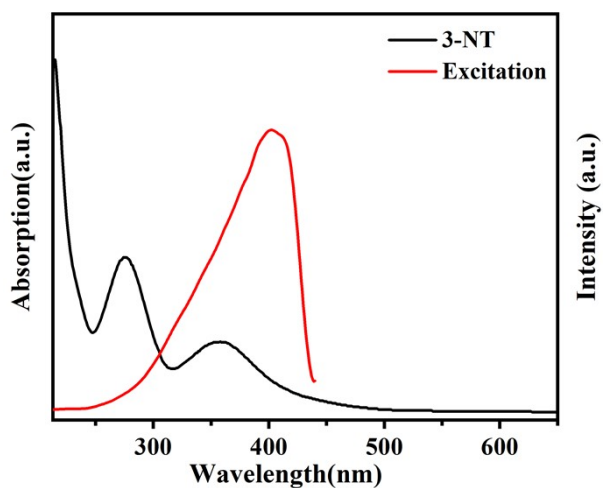

**Figure S10.** The UV-vis absorption spectra of 3-NT and excitation spectra of LCP 1 in water.

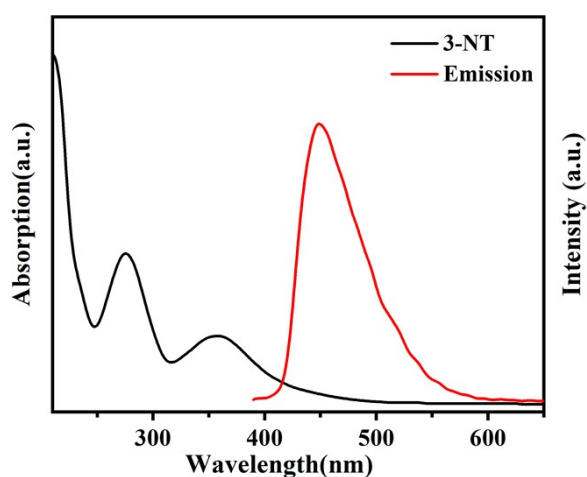

**Figure S11.** The UV-vis absorption spectra of 3-NT and emission spectra of LCP 1 in water.

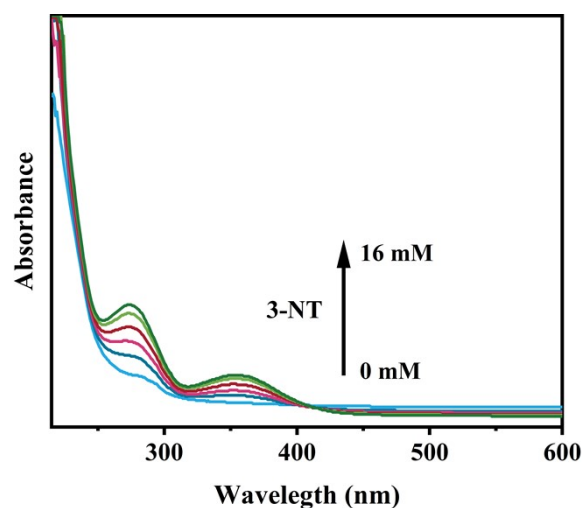

**Figure S12.** UV-vis spectra of LCP 1 in the presence of various concentrations (0-16 mM) of 3-NT solution.

**Table S4.** HOMO and LUMO energies calculated for ligand L and analyte at B3LYP/6-31G(d)

|      | HOMO (eV) | LUMO (eV) | Band Gap (eV) |
|------|-----------|-----------|---------------|
| L    | -6.1293   | -2.2503   | 3.8790        |
| 3-NT | -6.5713   | -2.7987   | 3.7726        |

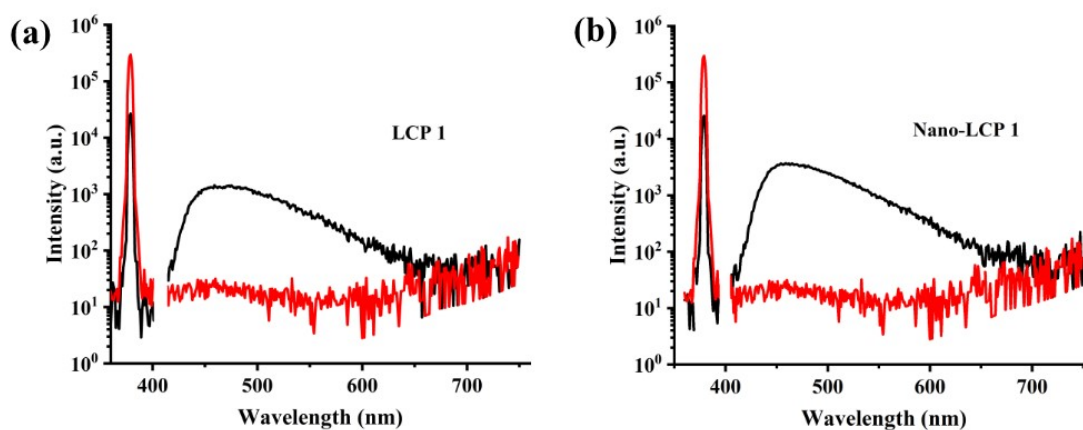

**Figure S13.** (a) Solid-state quantum yield diagram of LCP 1; (b) Solid-state quantum yield diagram of Nano-LCP 1

**Table S5.** Solid-state quantum yields of LCP 1 and Nano-LCP 1

|            | Quantum yield(%) |
|------------|------------------|
| LCP 1      | 13.10%           |
| Nano-LCP 1 | 31.80%           |



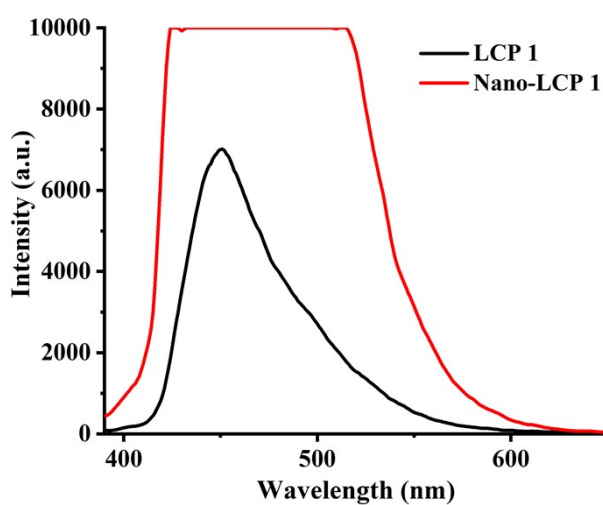

Figure S14. The emission spectra of LCP 1 and Nano-LCP 1.

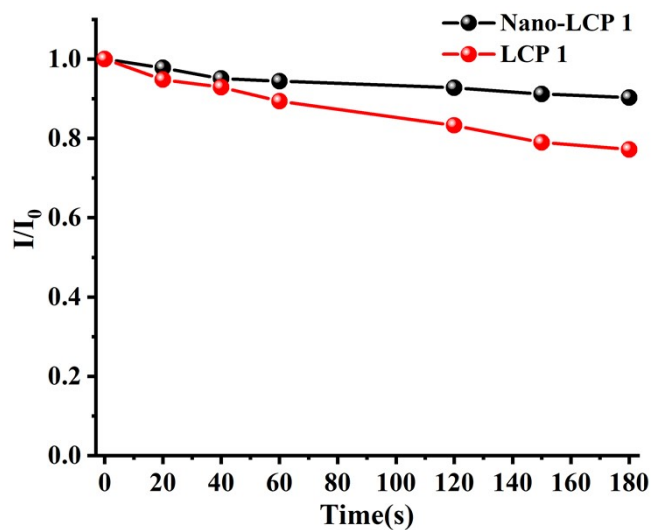

Figure S15. Fluorescence intensity ratio of the LCP 1 and Nano-LCP 1 samples standing within 3 min.

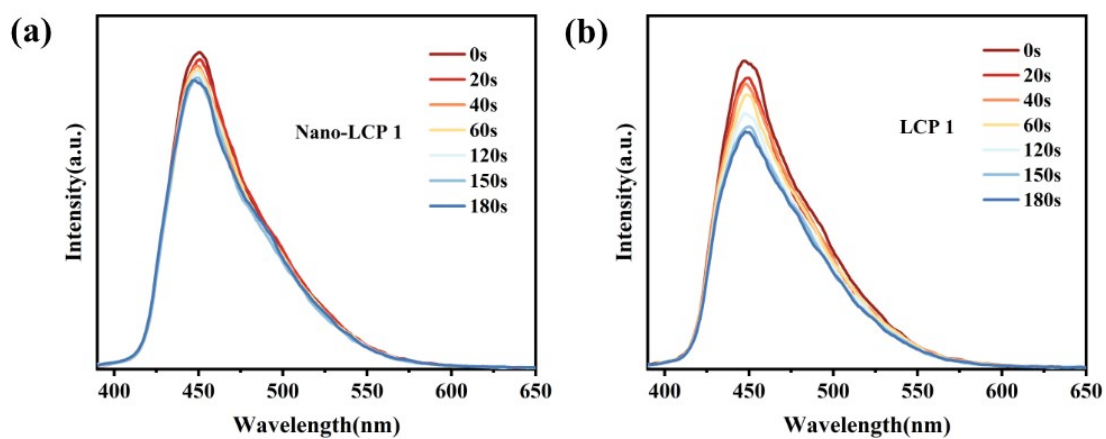

Figure S16. (a-b) Fluorescence intensity of the Nano-LCP 1 and LCP 1 standing within 3 min.

## References

1. Y.-F. Hsu, C.-H. Lin, J.-D. Chen and J.-C. Wang, *Cryst. Growth Des.*, 2008, **8**, 2047-2047.
2. G. Sheldrick, *Acta Crystallographica Section A*, 2008, **64**, 112-122.
3. T. Göen, A. Müller-Lux, P. Dewes, A. Musiol and T. Kraus, *J. Chromatogr. B*, 2005, **826**, 261-266.
4. L. Mergola, S. Scorrano, R. Del Sole, M. R. Lazzoi and G. Vasapollo, *Biosens. Bioelectron.*, 2013, **40**, 336-341.
5. Y. Q. Song, J. Liao, C. Zha, B. Wang and C. C. Liu, *Acta Pharm Sin B*, 2015, **5**, 482-486.
6. D. Teixeira, C. Prudencio and M. Vieira, *J. Chromatogr. B Anal. Technol. Biomed. Life Sci.*, 2017, **1046**, 48-57.
7. Q. Y. He, Y. S. Chen, D. Shen, X. P. Cui, C. G. Zhang, H. Y. Yang, W. Y. Zhong, S. A. Eremin, Y. X. Fang and S. Q. Zhao, *Talanta*, 2019, **195**, 655-661.
8. G. V. Martins, A. C. Marques, E. Fortunato and M. G. F. Sales, *Sensing and Bio-Sensing Research*, 2020, **28**, 100333.
9. L. H. Zhu, S. Li, W. X. Liu, J. Chen, Q. W. Yu, Z. Zhang, Y. Li, J. Liu and X. Chen, *Biosens. Bioelectron.*, 2021, **187**, 113284.
10. J. Geng, Y. Y. Li, H. Y. Lin, Q. Q. Liu, J. J. Lu and X. L. Wang, *Dalton Trans.*, 2022, **51**, 11390-11396.
